# Supplementary material for: Regional Differences in Ca2+ Signaling and Transverse-Tubules across Left Atrium from Adult Sheep
Source: MDPI journal article supplement (doi:10.3390/ijms24032347), 2023-01-25
Supplement: s1 [file s1]

Animated sequence of images of the typical  $\text{Ca}^{2+}$  response to electric stimulation in 4 cells from different regions of the left atria. Frames were recorded at 30 fps. Cells were loaded with Fluo-4.

Video S1: Epicardium

Video S2: Endocardium

Video S3: Free wall

Video S4: Pulmonary vein.
