# Supplementary material for: Regional Differences in Ca2+ Signaling and Transverse-Tubules across Left Atrium from Adult Sheep
Source: Int J Mol Sci. 2023 Jan 25;24(3):2347. doi: 10.3390/ijms24032347 (PMC9916916; doi:10.3390/ijms24032347)
Supplement: Supplementary file 1 [file ijms-24-02347-s001.zip]

Archive with 5 entries (5 files):
- Video S4.avi
- Video S3.avi
- Video S2.avi
- Video S1.avi
- Ijms- 2094739-supplementary.pdf
